# Supplementary material for: Hesperidin administration suppresses the proliferation of lung cancer cells by promoting apoptosis via targeting the miR-132/ZEB2 signalling pathway
Source: PubMed Central journal article supplement — Int J Mol Med. 2020 Oct 14;46(6):2069–77. doi: 10.3892/ijmm.2020.4756 (PMC7595658; doi:10.3892/ijmm.2020.4756), 2020-10-14

Figure S1. Transfection of A549 and H460 cells with miR-132 mimics, HN1 siRNA and ZEB2 siRNA was successful. (A) The expression of miR-132 was significantly increased in A549 cells transfected with miR-132 mimics. (B) The expression of HN1 was significantly decreased in A549 cells transfected with HN1 siRNA. (C) The expression of ZEB2 was significantly increased in A549 cells transfected with ZEB2 siRNA. (D) The expression of miR-132 was significantly increased in H460 cells transfected with miR-132 mimics. (E) The expression of HN1 was significantly decreased in H460 cells transfected with HN1 siRNA. (F) The expression of ZEB2 was significantly increased in H460 cells transfected with ZEB2 siRNA. # $P < 0.05$  vs. miRNA negative control; \* $P < 0.05$  vs. siRNA control group. miR-132, microRNA-132; siRNA, small interfering RNA; HN1, neurological expressed 1; ZEB2, zinc finger E-box binding homeobox 2.

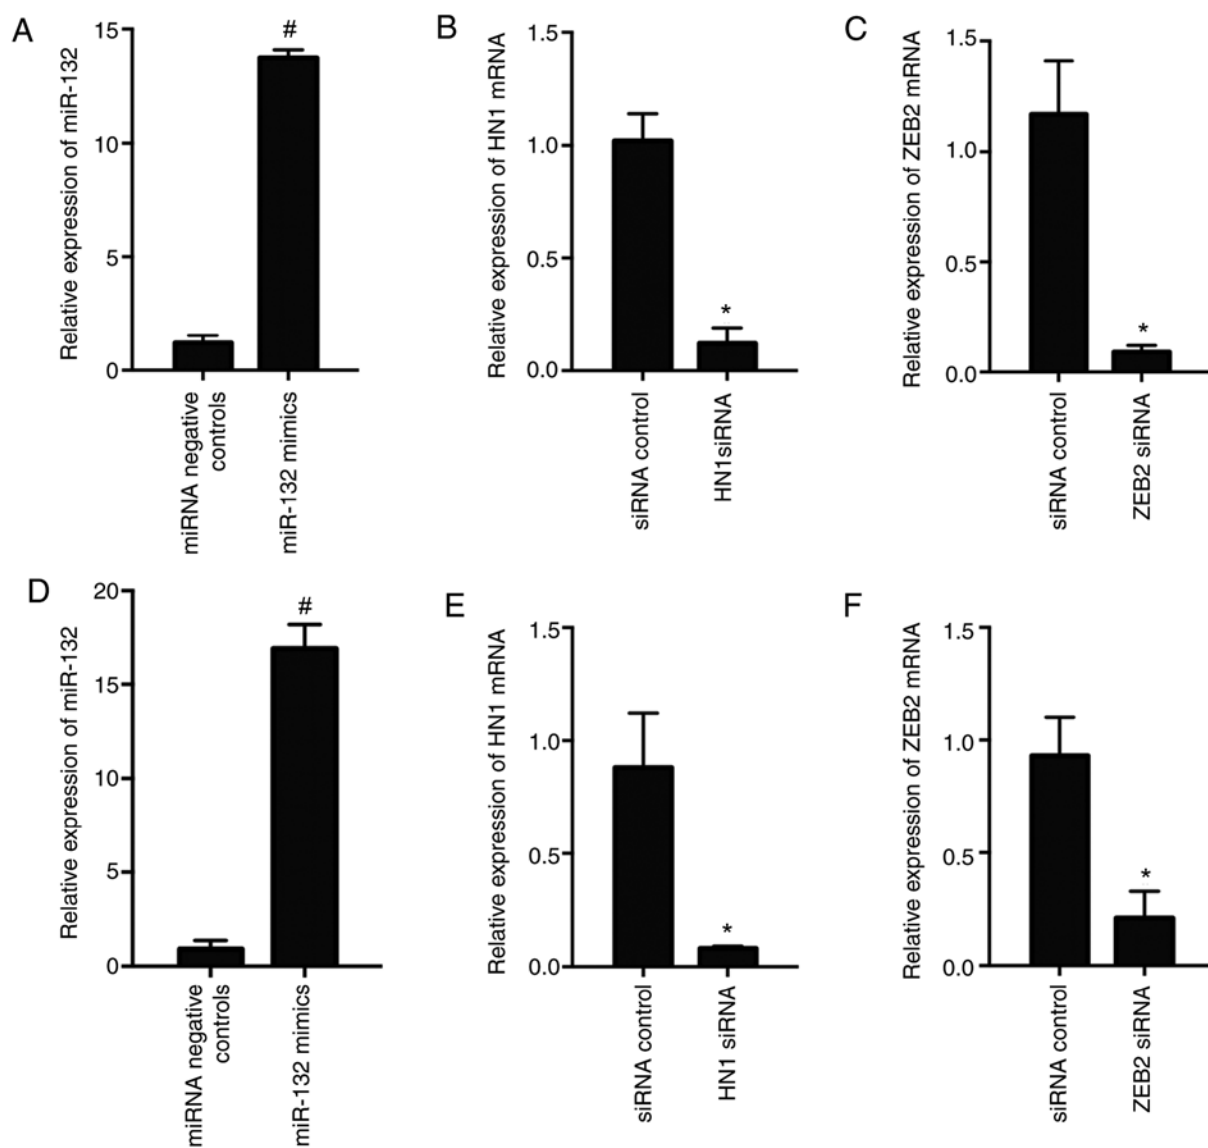

Supplement: Supplementary_Data.pdf [file Supplementary_Data.pdf]
